# Supplementary material
Source: PubMed Central journal article supplement (PMC6542617)
Supplement: jciinsight-4-127428-s030.pdf [file jciinsight-4-127428-s030.pdf]

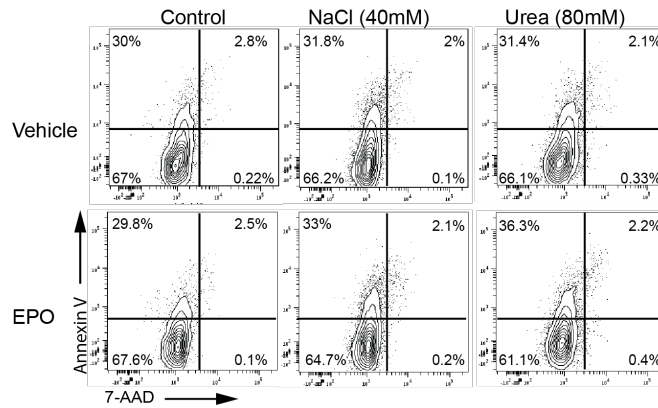

**Figure S1. EPO does not affect human T<sub>H</sub>17 survival.** Enriched human naïve CD4<sup>+</sup> T cells were cultured in the presence of T<sub>H</sub>17 polarizing conditions (see methods) in control media or in media with 20-40 mM NaCl or 40-80 mM urea added in the presence of EPO (1,000 IU/ml) or vehicle control for 5 days. Representative flow plots from 5 experiments from 7 different donors. Quantification of these data is provided in **Figure 1E**.

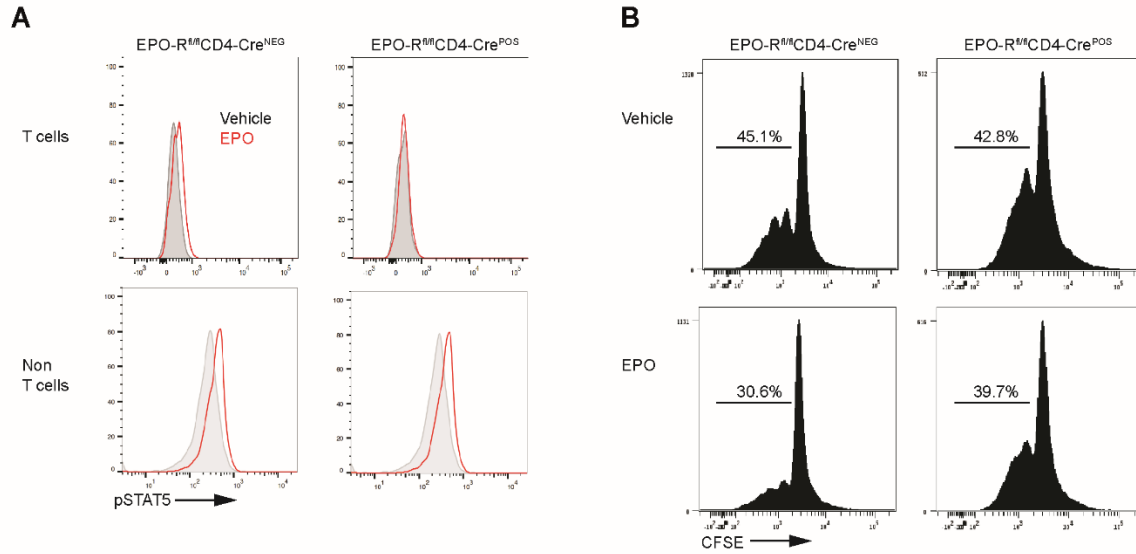

**Figure S2. Lack of functional in T cells of EPO-R<sup>fl/fl</sup>CD4-Cre<sup>POS</sup> mice. (A)** STAT5 phosphorylation in EPO-R<sup>fl/fl</sup>CD4-Cre<sup>POS</sup> and Cre<sup>NEG</sup> T cells and non T cells (representative of 3 mice per group) after 15 minute stimulation with EPO (2,000 IU/ml) or vehicle. **(B)** CFSE dilution of EPO-R<sup>fl/fl</sup>CD4-Cre<sup>POS</sup> T cells activated with anti-CD3/anti-CD28 mAb and treated with EPO (1,500 IU/ml) or vehicle for 3 days (representative of 5 mice per group).

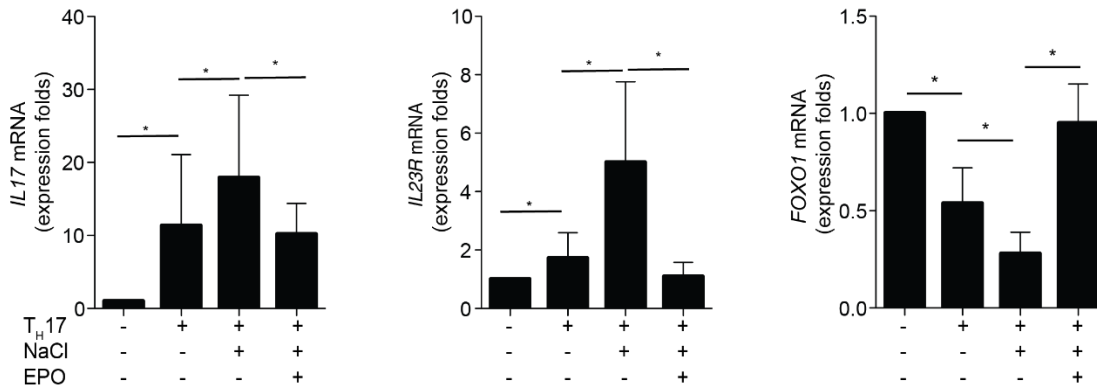

**Figure S3. Effect of EPO on *IL17*, *IL23R*, and *FOXO1* mRNA in naïve CD4<sup>+</sup> T cells cultured in T<sub>H</sub>17 polarizing conditions.** Enriched human naïve CD4<sup>+</sup> T cells were cultured for 48 hours in T<sub>H</sub>0 or T<sub>H</sub>17 polarizing conditions with or without NaCl or EPO (1,000 IU/ml) (n = 3 donors). \*P < 0.05, two-way ANOVA with Tukey test.

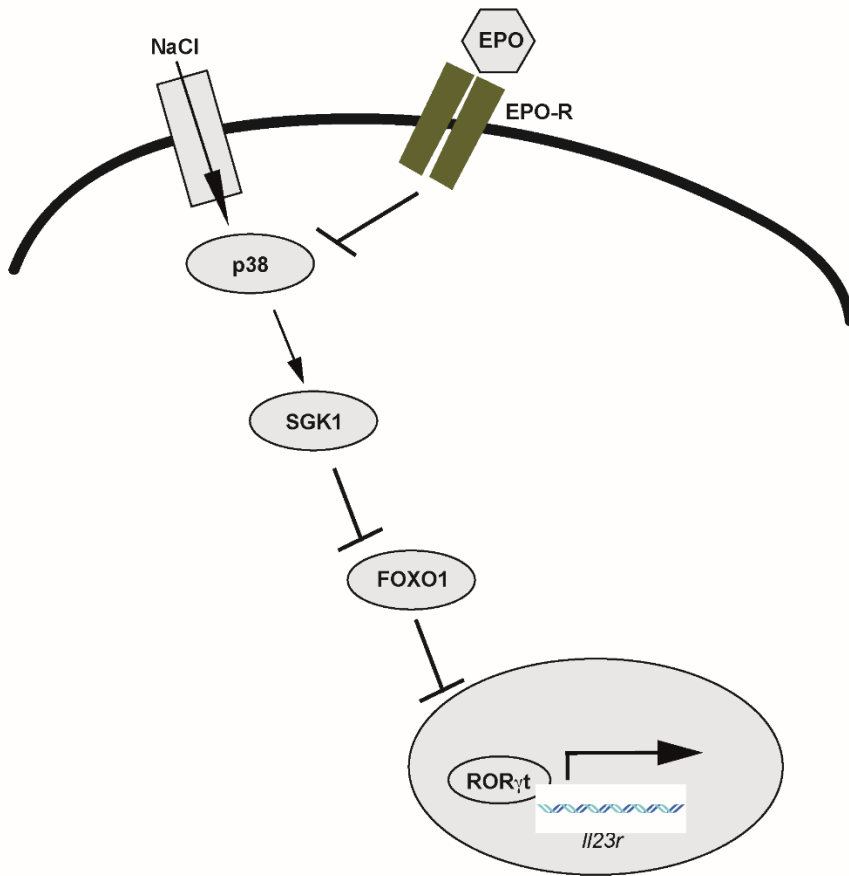

**Figure S4. Schematic of EPO-induced inhibition of p38 and SGK1.** In the presence of EPO, FOXO1 inhibitory effects on ROR $\gamma$ t are unleashed, leading to reduced IL-23 receptor (IL-23R) expression and IL-17 production.



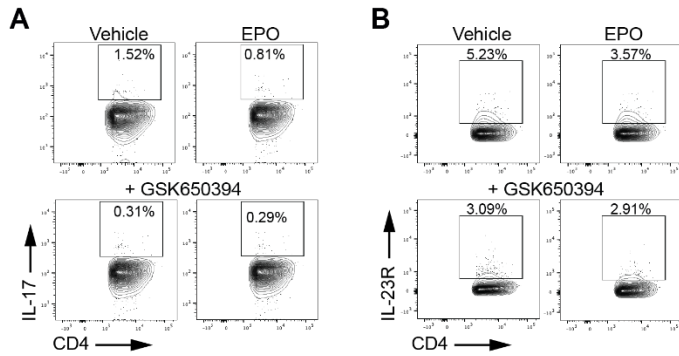

**Figure S5. Effect of EPO on IL-17 and IL-23R expression in naïve CD4<sup>+</sup> T cells cultured in T<sub>H</sub>17 polarizing conditions in the presence of SGK1 inhibitor.** Enriched human naïve CD4<sup>+</sup> T cells were cultured in T<sub>H</sub>17 polarizing conditions with or without EPO (1,000 IU/ml) and SGK1 inhibitor GSK650394 (10nM) (n = 5 donors). (A and B) Representative plots of IL-17 and IL-23R expression after 5 days of culture (data are quantified in **Figure 2L-M**).

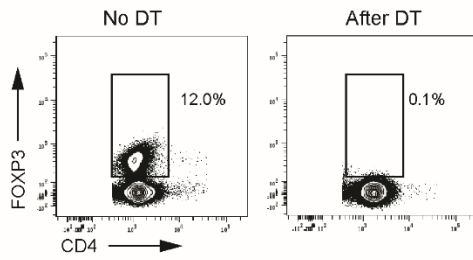

**Figure S6. *Diphtheria* toxin depletes T<sub>REG</sub> in *Foxp3*<sup>DTR</sup> mice.** CD4<sup>+</sup>FOXP3<sup>+</sup> T cells in the spleen of *Foxp3*<sup>DTR</sup> mice without or after treatment with *Diphtheria* toxin (DT) for 1 week (representative of 3 mice per group).

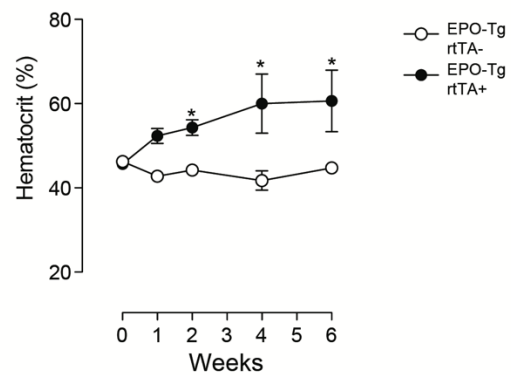

**Figure S7. Hematocrit levels in EPO-Tg rtTA<sup>+</sup> mice.** Hematocrit levels in EPO-Tg rtTA<sup>+</sup> and control EPO-Tg rtTA<sup>-</sup> mice over a 6-week period of DOX feeding. \* P < 0.05 vs. rtTA<sup>-</sup> at the same time-point (n = 5 per group), two-way ANOVA with Tukey's multiple comparison test.

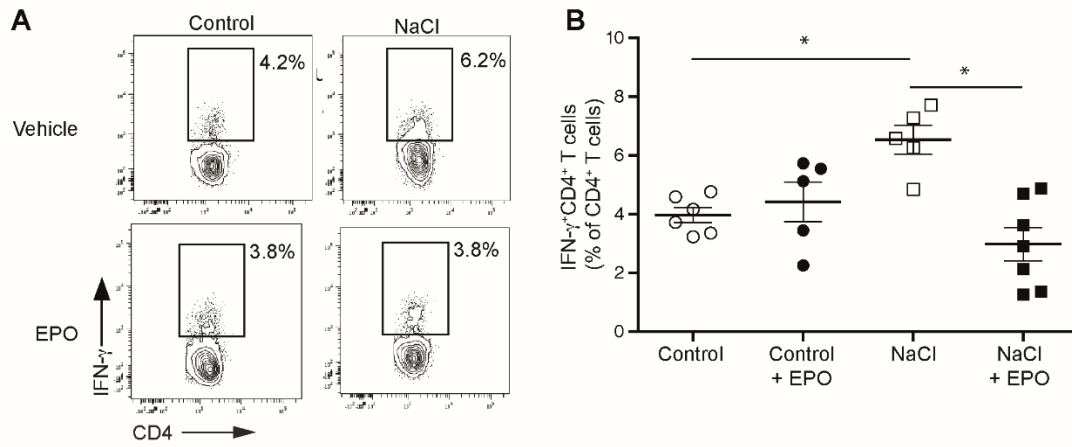

**Figure S8. Effect of EPO treatment on  $T_H1$  cells from aristolochic acid treated mice. (A)** Representative plots and **(B)** data quantification of  $CD4^+IFN-\gamma^+$  T cells at 6 weeks after aristolochic acid treatment in B6 male mice receiving saline or EPO and fed on normal versus high-NaCl diet. \* $P < 0.05$ , two-way ANOVA with Tukey test.

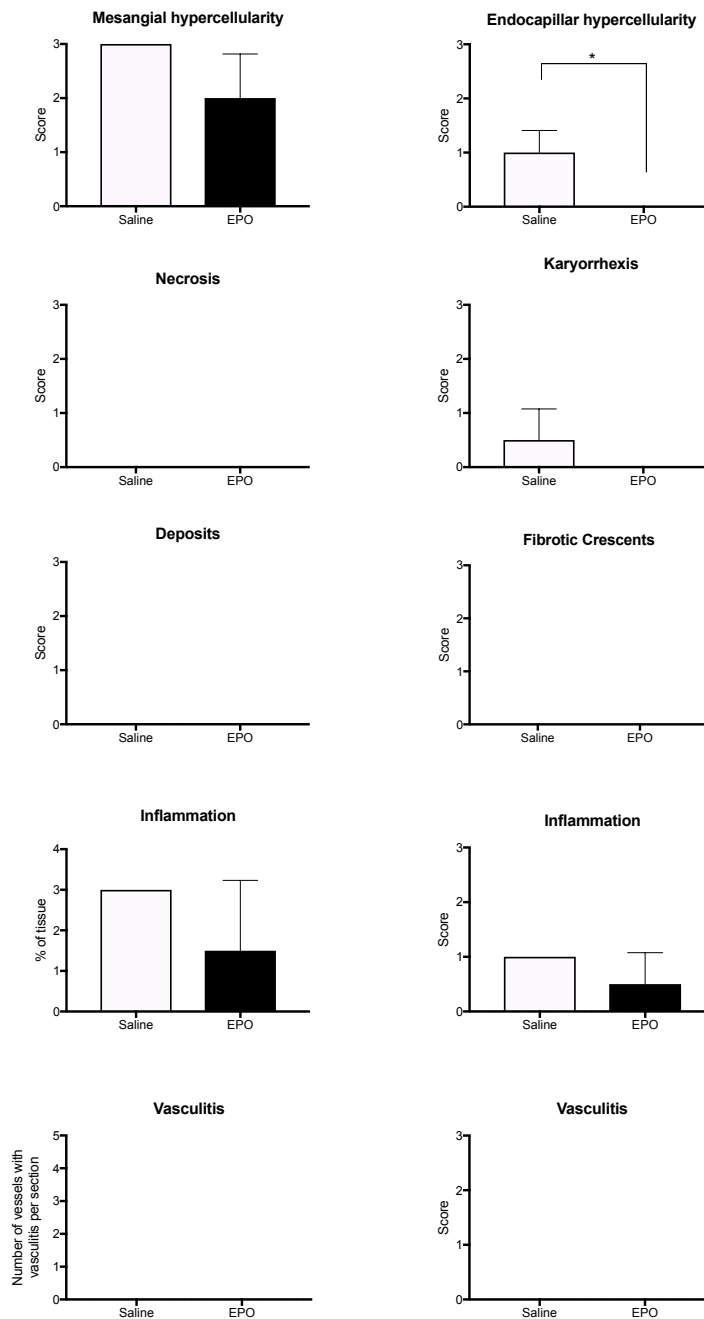

**Figure S9. Effect of EPO treatment on histological scores in pristane treated mice.** Histological scores of mice shown in **Figure 8**. B6 male mice ( $n = 3-4$  per group) were treated with pristane at the age of 2 months and either EPO or vehicle control for 2 additional months and then sacrificed. Each parameter was scored from 0 to 3 depending on the percentage of glomeruli affected by the various lesions (such that 0=0, <25% = 1, 25-50% = 2; >50% = 3). Inflammation was quantified both as the percentage of cortical parenchyma with interstitial inflammation and as a score (0-3). Similarly, vasculitis has been quantified as the number of arteries with arteritis per tissue section because and as a score (0-3). All kidney sections were quantified by a pathologist blinded to the group assignment. \* $P < 0.05$ , unpaired t-test.

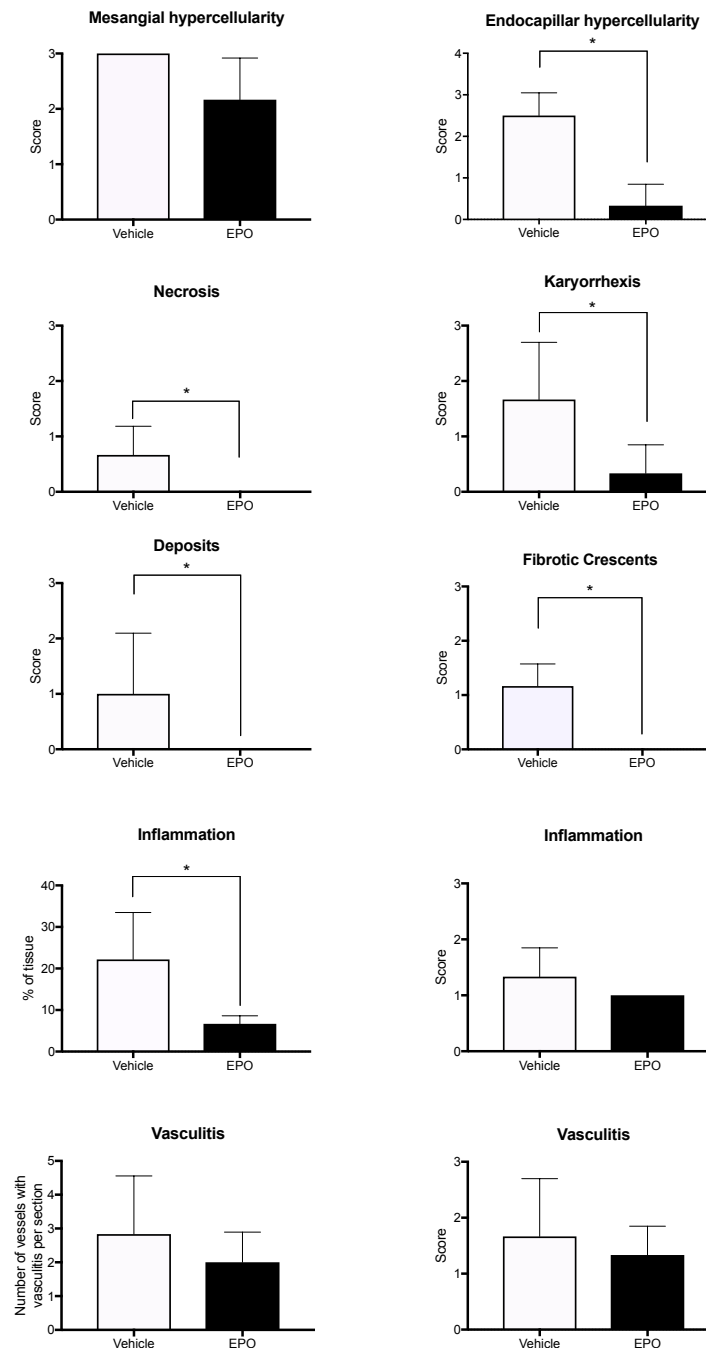

**Figure S10. Effect of EPO treatment on histological scores in MRL-*lpr* mice.** Histological scores of mice shown in **Figure 9**. Four-month old MRL-*lpr* mice were treated with saline or rEPO from the age of 2 months ( $n = 6-9$  per group). Each parameter was scored from 0 to 3 depending on the percentage of glomeruli affected by the various lesions (such that 0=0, <25% = 1, 25-50% = 2; >50% = 3). Inflammation was quantified both as the percentage of cortical parenchyma with interstitial inflammation and as a score (0-3). Similarly, vasculitis has been quantified as the number of arteries with arteritis per tissue section because and as a score (0-3). All kidney sections were quantified by a pathologist blinded to the group assignment. \* $P < 0.05$ , unpaired t-test

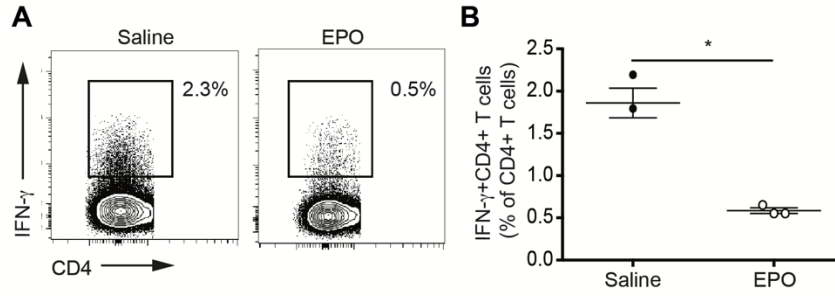

**Figure S11. Effect of EPO treatment on T<sub>H</sub>1 cells in MRL-*lpr* mice.** (A) Representative plots and (B) data quantification of T<sub>H</sub>1 cells in female MRL-*lpr* mice treated with saline or EPO from month 2 to month 4 of age. \*P < 0.05, unpaired t-test.
